# Supplementary material for: Soyasapogenol C from Fermented Soybean (Glycine Max) Acting as a Novel AMPK/PPARα Dual Activator Ameliorates Hepatic Steatosis: A Novel SANDA Methodology
Source: MDPI journal article supplement (doi:10.3390/ijms23105468), 2022-05-13
Supplement: s1 [file s1]

# Soyasapogenol C from Fermented Soybean (*Glycine Max*) Acting as a Novel AMPK/PPAR $\alpha$ Dual Activator Ameliorates Hepatic Steatosis: A Novel SANDA Methodology

Radha Arulkumar <sup>1</sup>, Hee Jin Jung <sup>2</sup>, Sang Gyun Noh <sup>1</sup> and Hae Young Chung <sup>1,2,\*</sup>

<sup>1</sup> Interdisciplinary Research Program of Bioinformatics and Longevity Science, Pusan National University, Busan 46241, Korea; radhuspn@gmail.com (R.A.); rskrsk92@naver.com (S.G.N.)

<sup>2</sup> Department of Pharmacy, College of Pharmacy, Pusan National University, Busan 46241, Korea; hjjung2046@pusan.ac.kr

\* Correspondence: hyjung@pusan.ac.kr; Tel.: 82-51-510-2814

## Supplementary Materials:

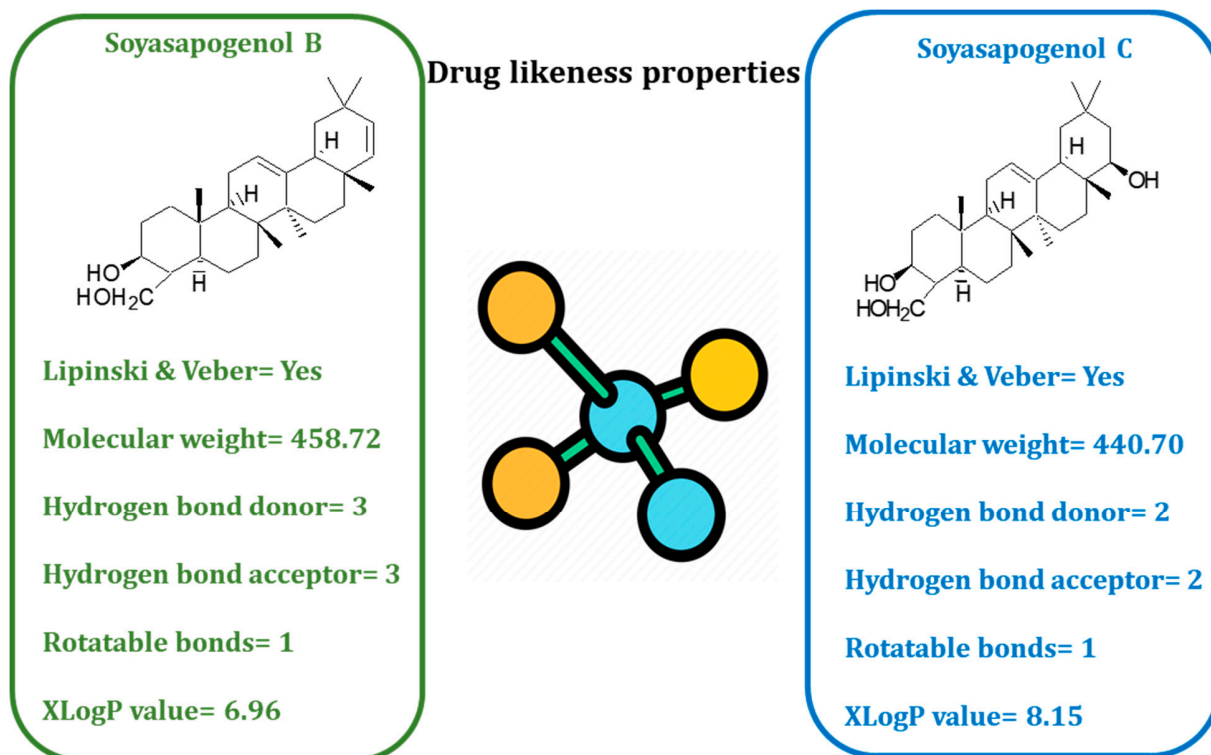

Figure S1. The structural similarity evaluation of soyasapogenol B and soyasapogenol C.

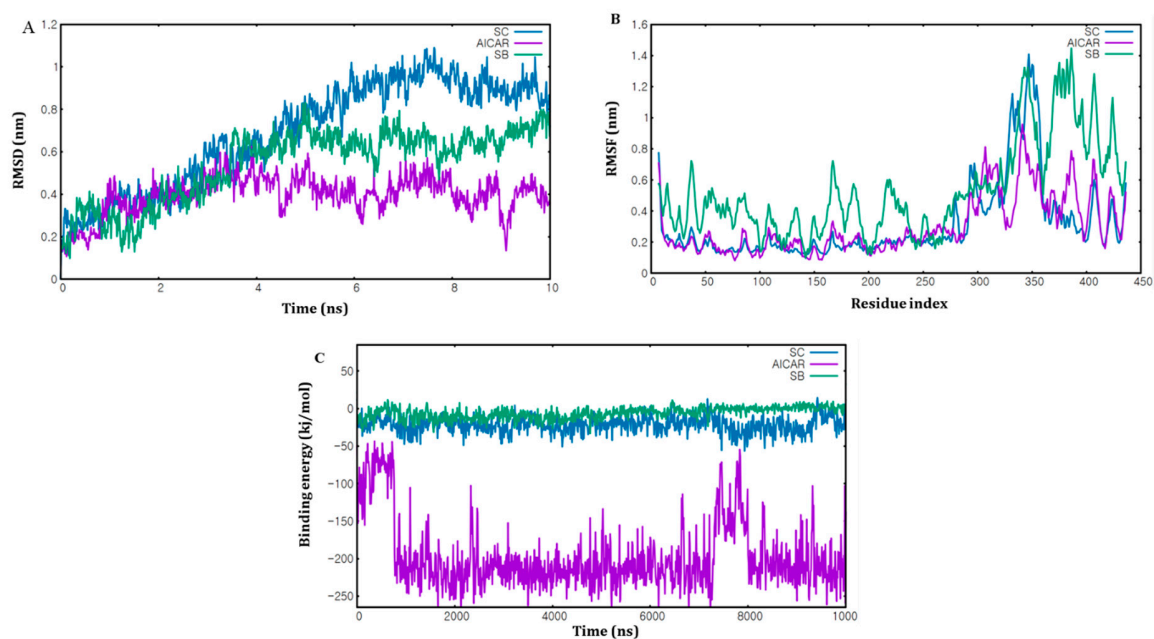

Figure S2. Molecular dynamic simulation: (A) RMSD plots between soyasapogenol C (blue), soyasapogenol B (green), and AICAR (purple) with AMPK; (B) RMSF plots between soyasapogenol C (blue), soyasapogenol B (green), and AICAR (purple) with AMPK; (C) Binding interaction plots between soyasapogenol C (blue), soyasapogenol B (green), and AICAR (purple) with AMPK at 10ns. \*SC—soyasapogenol C; SB—soyasapogenol B; AICAR—5-Aminoimidazole-4-carboxamide ribonucleotide.

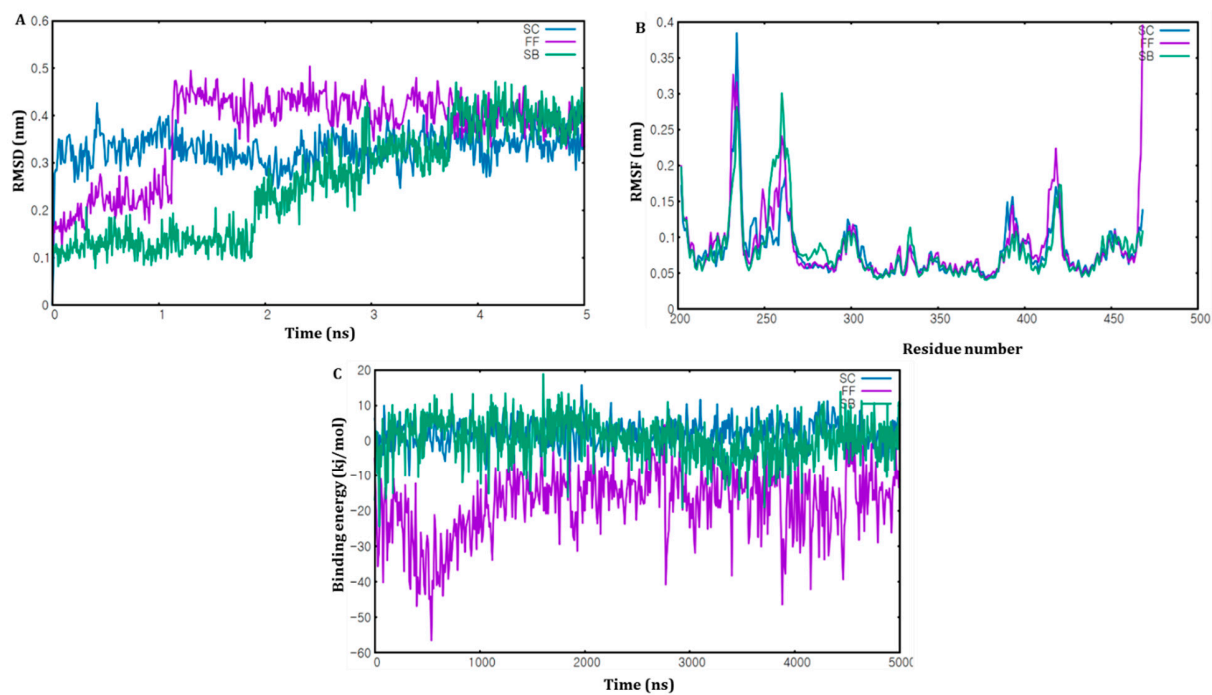

Figure S3. Molecular dynamic simulation: (A) RMSD plots between soyasapogenol C (blue), soyasapogenol B (green), and fenofibrate (purple) with PPAR $\alpha$ . (B) RMSF plots between soyasapogenol C (blue), soyasapogenol B (green), and fenofibrate (purple) with PPAR $\alpha$  at 5 ns. (C) Binding interaction plots between soyasapogenol C (blue), soyasapogenol B (green), and fenofibrate (purple) with PPAR $\alpha$  at 5ns. \* SC—soyasapogenol C; SB—soyasapogenol B; FF—fenofibrate.

Table S1. Group B soyasaponin, soyasaponin, DDMP saponin, and soyasaponin aglycones present in fermented soybean Cheonggukjang, and their activities.

| Serial. No | Types                        | Compounds              | Effects                                                                                                                                      |
|------------|------------------------------|------------------------|----------------------------------------------------------------------------------------------------------------------------------------------|
| 1          | Group B<br>soyasaponin       | Soyasaponin I          | Anti-inflammatory, anti-carcinogenic, hepatoprotective, cardiovascular protective, antimicrobial, anti-oxidative, adjuvant kidney protective |
| 2          |                              | Soyasaponin II         | Hepatoprotective, cardiovascular protective, anti-viral                                                                                      |
| 3          |                              | Soyasaponin III        | Anti-inflammatory, anti-carcinogenic, hepatoprotective                                                                                       |
| 4          |                              | Soyasaponin IV         | Anti-carcinogenic, cardiovascular protective                                                                                                 |
| 5          |                              | Soyasaponin V          |                                                                                                                                              |
| 6          |                              | Soyasaponin VI         |                                                                                                                                              |
| 7          | Soyasaponin                  | Dehydrosoyasaponin I   | Potent and reversible calcium-activated potassium (maxi-K) channels activator                                                                |
| 8          | Soyasaponin<br>aglycone      | Soyasapogenol A        | Anti-carcinogenic, hepatoprotective, anti-viral                                                                                              |
| 9          |                              | Soyasapogenol B        | Anti-inflammatory, anti-mutagenic, anti-carcinogenic, hepatoprotective, anti-viral                                                           |
| 10         |                              | Soyasapogenol C        | Anti-Inflammatory, anti-viral                                                                                                                |
| 11         |                              | Soyasapogenol D        |                                                                                                                                              |
| 12         | DDMP group of<br>soyasaponin | Soyasaponin $\alpha$ g | Antioxidant, anti-obesity, anti-tumorigenic, anti-hypertension, anti-arcopenia, skin                                                         |
| 13         |                              | Soyasaponin $\beta$ a  | whitening, immune modulation, sympathetic                                                                                                    |
| 14         |                              | Soyasaponin $\gamma$ a | nerve activity, anti-diabetic activity                                                                                                       |
| 15         |                              | Soyasaponin $\gamma$ g |                                                                                                                                              |

Table S2. Docking score of Soyasaponin B group, soyasaponin, DDMP saponin, and soyasaponin aglycones present in fermented soybean Cheonggukjang using Auto Dock Vina and AutoDock4.

| Compound               | AMPK          |           | LKB1          |           | PPAR $\alpha$ |           |
|------------------------|---------------|-----------|---------------|-----------|---------------|-----------|
|                        | AutoDock Vina | AutoDock4 | AutoDock Vina | AutoDock4 | AutoDock Vina | AutoDock4 |
| Control                | -5.7          | -10.81    | -7.4          | -7.22     | -6.7          | -7.81     |
| Soyasaponin I          | 2.6           | -3.69     | 0.6           | -10.24    | 12.8          | 52.74     |
| Soyasaponin II         | 0.6           | 0.66      | -3.4          | -3.95     | 19.1          | 68.81     |
| Soyasaponin III        | 19.2          | 416.51    | 35.6          | 376.24    | 122.8         | 2.37E+03  |
| Soyasaponin IV         | -3.3          | -10.31    | 1             | -10.85    | 6.8           | 19.82     |
| Soyasaponin V          | 25.6          | 337.57    | 26.7          | 218.58    | 88.8          | 6.39E+03  |
| Soyasaponin VI         | 6.4           | 86.93     | 1.2           | 31.8      | 25            | 236.48    |
| Soyasapogenol A        | -3.3          | -8.22     | -8.2          | -10.35    | 3.5           | -1.84     |
| Soyasapogenol B        | -3.7          | -7.68     | -8.8          | -9.3      | 2             | -5.82     |
| Soyasapogenol C        | -7.2          | -10.24    | -9.4          | -8.97     | 4.2           | -8.95     |
| Soyasapogenol D        | -6.4          | -10.98    | -8.2          | -10.16    | 4.2           | -2.12     |
| Soyasaponin $\alpha$ g | 17.6          | 362.34    | 8.4           | 216.29    | 26.2          | 271.11    |
| Soyasaponin $\beta$ a  | 9.3           | 102.16    | 0.2           | 138.88    | 21.5          | 385.91    |
| Soyasaponin $\gamma$ a | -4.1          | 6.67      | -6.2          | -4.14     | 3.8           | 20.45     |
| Soyasaponin $\gamma$ g | -0.9          | 1.62      | -0.8          | -7.13     | -1            | 29.62     |
| Dehydrosoyasaponin I   | 4.7           | -4.62     | 2             | -13.05    | 14            | 27.21     |

Table S3. In silico docking score of active compounds soyasapogenol C, soyasapogenol B, and control compounds AICAR (AMPK) and fenofibrate (PPAR $\alpha$ ) with targets AMPK and PPAR $\alpha$ , using four different docking tools.

| Compounds       | AMPK (PDB ID: 2Y94) |           |            |        |
|-----------------|---------------------|-----------|------------|--------|
|                 | Auto Dock Vina      | AutoDock4 | Swiss Dock | LeDock |
| AICAR*(Control) | -6                  | -7.54     | -9.01      | -6.01  |
| Soyasapogenol B | -3.7                | -7.68     | -7.39      | -4.67  |
| Soyasapogenol C | -7.2                | -10.24    | -6.96      | -4.64  |

\*AICAR- 5-Aminoimidazole-4-carboxamide ribonucleotide

  

| Compounds             | PPAR $\alpha$ (PDB ID: 1K7L) |           |            |        |
|-----------------------|------------------------------|-----------|------------|--------|
|                       | Auto Dock Vina               | AutoDock4 | Swiss Dock | LeDock |
| Fenofibrate (Control) | -7.4                         | -9.67     | -8.59      | -3.67  |
| Soyasapogenol B       | 2                            | -5.82     | -5.47      | -2.31  |
| Soyasapogenol C       | 4.2                          | -8.95     | -7.91      | -2.17  |

Table S4. The binding energy and interacting residues obtained by calculating the molecular docking data of AMPK and PPAR $\alpha$  with controls and soyasapogenol C, using Auto Dock 4.2.

| Compounds                                                                                           | Binding energy<br>(kcal/mol) | Intermolecular energy<br>(kcal/mol) | Common residues                                                                             |
|-----------------------------------------------------------------------------------------------------|------------------------------|-------------------------------------|---------------------------------------------------------------------------------------------|
| AMPK                                                                                                |                              |                                     |                                                                                             |
| Soyasapogenol C                                                                                     | -10.24                       | -11.16                              | VAL24, GLY25, VAL30,<br>LYS45, MET93, GLU100,<br>GLU143, ASN144, LEU146,<br>ALA156, ASP157. |
| AICAR* (control)                                                                                    | -7.54                        | -6.20                               |                                                                                             |
| PPAR $\alpha$                                                                                       |                              |                                     |                                                                                             |
| Soyasapogenol C                                                                                     | -8.95                        | -9.73                               | CYS276, THR279, LEU321,<br>MET330, VAL332                                                   |
| Fenofibrate (control)                                                                               | -9.67                        | -11.41                              |                                                                                             |
| <ul style="list-style-type: none"><li>AICAR—5-Aminoimidazole-4-carboxamide ribonucleotide</li></ul> |                              |                                     |                                                                                             |

Table S5. Human primer sets for real-time PCR.

| Gene                            | Primer                  |                          |
|---------------------------------|-------------------------|--------------------------|
|                                 | Forward (5'→3')         | Reverse (3'→5')          |
| <i>ACOX-1</i>                   | AGGTCACAGCTGTCCAACCA    | TTACCCAGCCCTGGCTTAAT     |
| <i>CPT-1<math>\alpha</math></i> | GGTCCAGGTAGAGCTCAGGC    | GTGCTCTGAGGCCTTTGTCA     |
| <i>ACC</i>                      | GCTGCTCGGATCACTAGTGAA   | TTCTGCTATCAGTCTGTCCAG    |
| <i>FASN</i>                     | GACATCGTCCATTCGTTTGTG   | CGGATCACCTTCTTGAGCTCC    |
| <i>GAPDH</i>                    | CATGTTCGTCATGGGGTGAACCA | AGTGATGGCATGGACTGTGGTCAT |
